# Supplementary material
Source: Springer Nature journal article supplement (https://www.springermedizin.de/resource/supplementary/13014_2011_420_MOESM5_ESM.pdf/9633752)

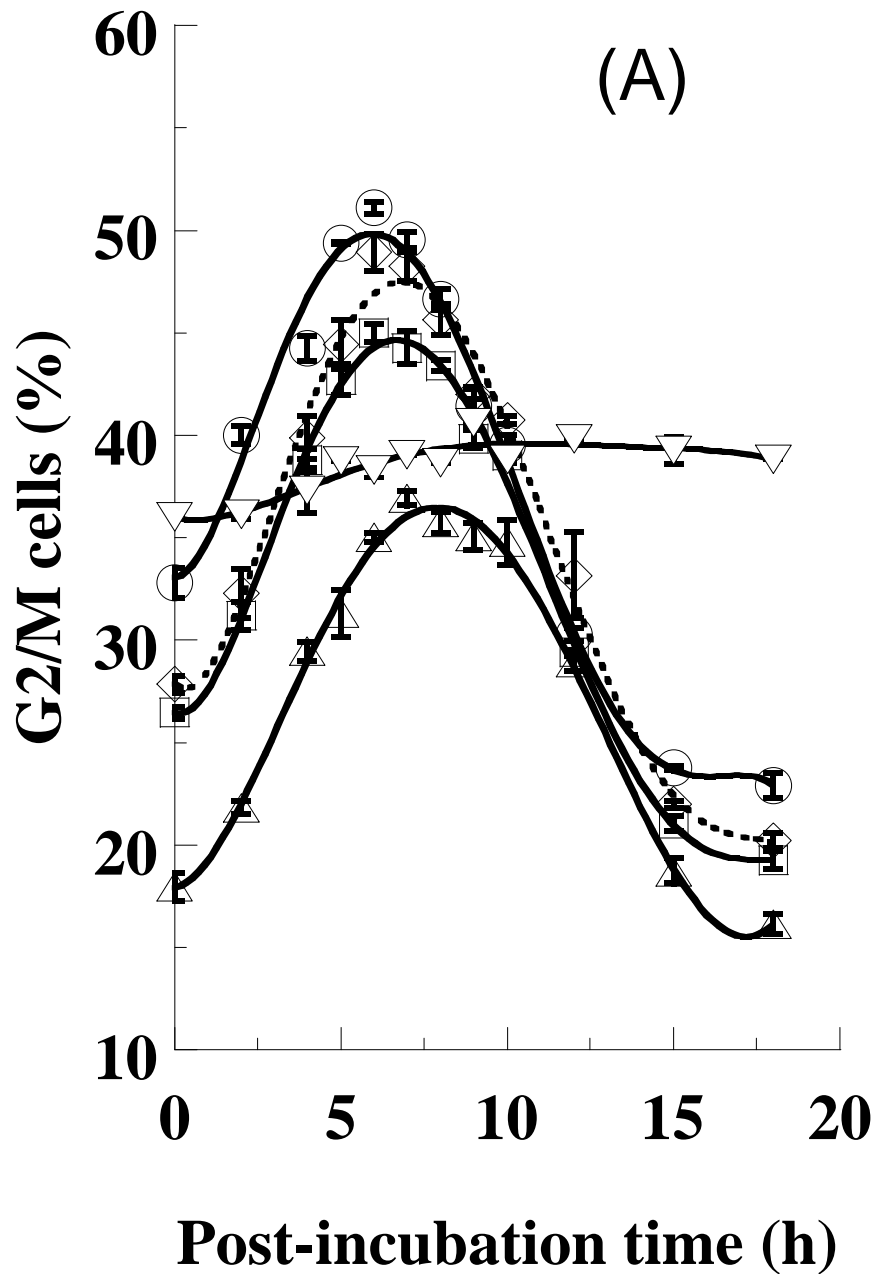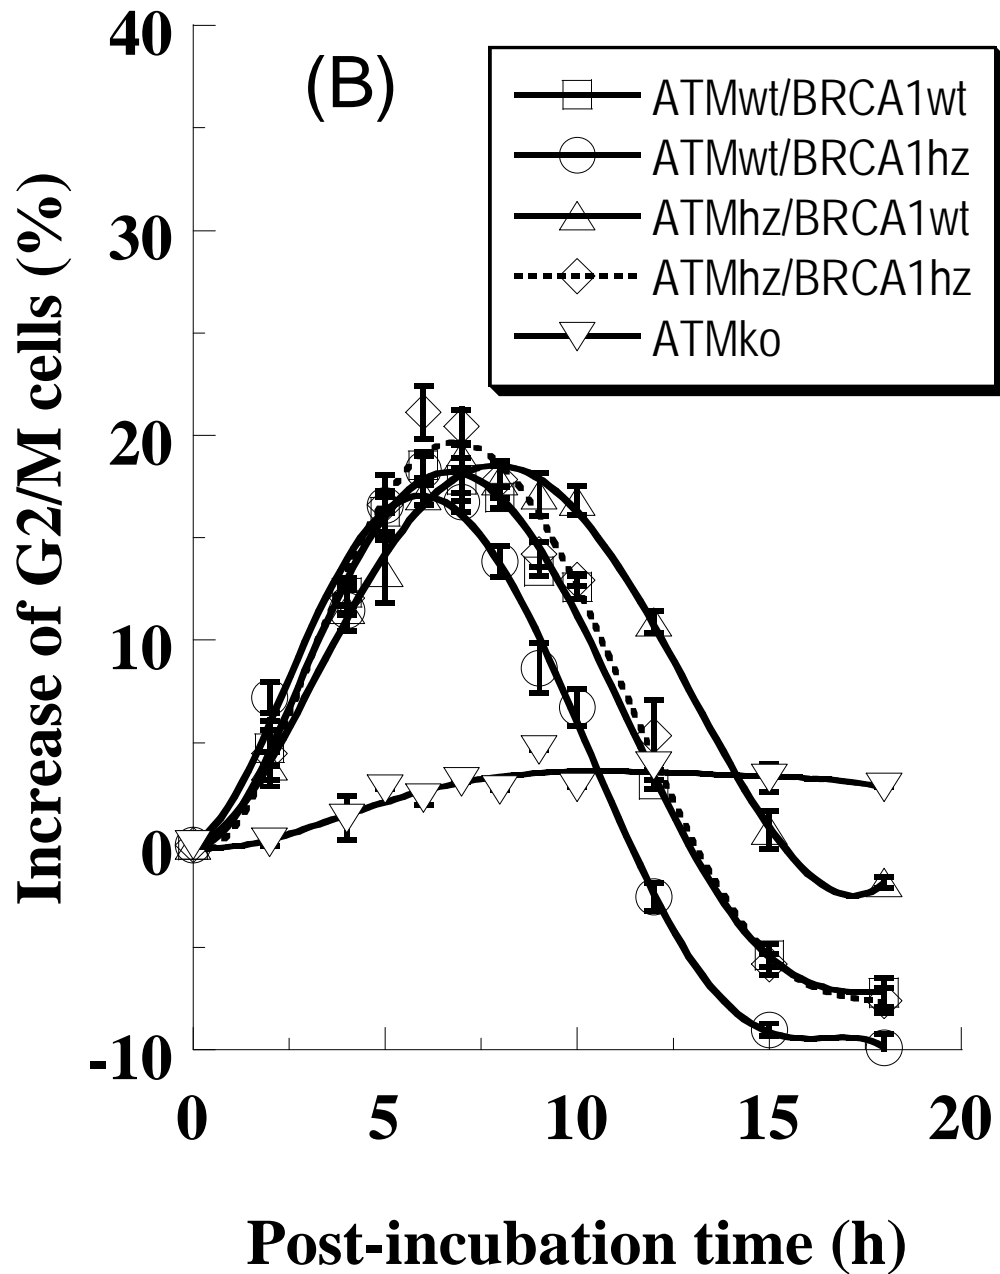

Supplement: MOESM5 [file 9633752]
